# Supplementary material
Source: Springer Nature journal article supplement (https://www.springermedizin.de/resource/supplementary/12891_2013_1913_MOESM2_ESM.pdf/9508780)

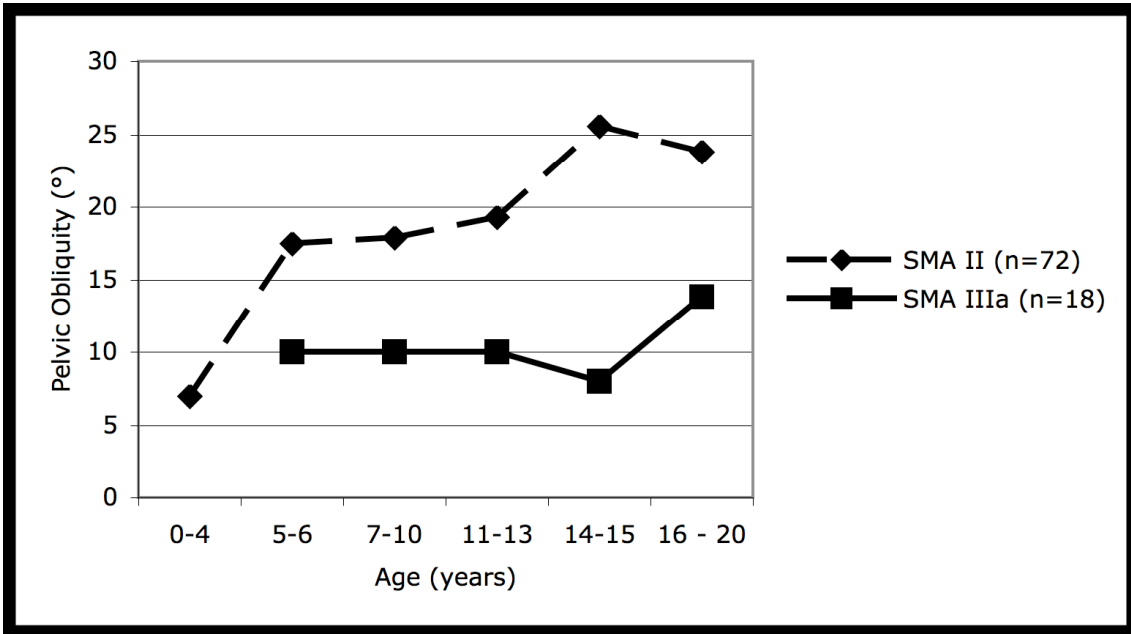

Figure 2: Course of pelvic obliquity in SMA II and IIIa patients not operated on

Supplement: MOESM2 [file 9508780]
